Anesthesiology  
68:825, 1988

## Nail Polish Color Can Affect Pulse Oximeter Saturation

*To the Editor:*—Pulse oximetry provides reliable and noninvasive monitoring of arterial oxygenation.<sup>1</sup> The Ohmeda Biox® 3700 pulse oximeter adult finger probe contains two Light Emitting Diodes (LEDs), emitting light at 660 nm and 940 nm wavelengths, and a photodetector diode that measures the light that passed through the tissue. The relative absorbances of oxygenated and deoxygenated hemoglobin affect the amount of the different wavelengths of light detected by the photodetector.<sup>2</sup> Any substance in the blood or tissue that absorbs light of the same wavelength as that produced by the LEDs may alter the amount of light sensed by the photodetector and thus change oximeter-determined oxygen saturation (SpO<sub>2</sub>).

Factors interfering with accurate determination of SpO<sub>2</sub> include infrared heat lamps,<sup>3</sup> high-intensity ambient light,<sup>4</sup> patient movement, electrocautery, cardiopulmonary bypass, hypothermia, administration of vasopressors, hypoperfusion, dyshemoglobinemias,<sup>5</sup> and iv-administered dyes (methylene blue, indigo carmine, indocyanine green).<sup>6,7</sup> It has been reported that nail polish (NP) does not interfere with pulse oximetry.<sup>8</sup> The authors, however, do not mention what colors of NP were used. I examined the effect of 31 colors of NP on SpO<sub>2</sub> (table 1).

A healthy female OR nurse was the volunteer. An adult finger probe (Ohmeda Biox® 3700 pulse oximeter) was applied to the nail bed of the right index finger. While she was breathing room air, a baseline measurement of SpO<sub>2</sub> without NP was obtained. Then, two coats of NP were applied to the same finger (one color at a time), were allowed to dry, and SpO<sub>2</sub> was again measured. This procedure was repeated for each color. The only color of NP that had any effect on the SpO<sub>2</sub> was "Blue Flame" nail enamel by Avon (Avon Prod. Inc., NY, NY, 10019). It decreased SpO<sub>2</sub> from 97% to 87%. This NP was then analyzed with the Perkin-Elmer 552 spectrophotometer. The NP absorbed light maximally at 688 nm—very near 660 nm wavelength of light emitted by one of the oximeter LEDs. Thus, the NP absorbed most of the 660 nm light emission and the

TABLE 1. Colors of Nail Polish Evaluated (in Alphabetical Order)

|                        |              |                |
|------------------------|--------------|----------------|
| Black                  | Coral        | Red            |
| Blue Flake             | Fuschia Fire | Rose           |
| Blue Flame             | Garnet       | Rosewine       |
| Blue (Iceberg)         | Gemsmoke     | Ruby Red       |
| Brandy                 | Gold Sequins | Silver Lilac   |
| Clear                  | Green        | Silver Screen  |
| Clear with Toluene     | Mulberry     | Silver Sequins |
| Clear with UV Absorber | Orchid       | Silver Struck  |
| Clear with Blue Dye #1 | Plum         | Tangerine      |
| Copper Sequins #1      | Purple       | Violet         |
| Copper Sequins #2      |              |                |

oximeter, therefore, interpreted this absorption as the presence of reduced hemoglobin and a reduction in SpO<sub>2</sub>.

In conclusion, some nail polish, especially blue, may interfere with SpO<sub>2</sub> measurement and should be removed preoperatively.

The author wishes to thank Frank D. Blum, Ph.D., and Fred Hartke, Ph.D., from the Department of Chemistry, University of Missouri-Rolla, for their assistance with the photospectrometric analysis.

ALEXANDER S. RUBIN, M.D.  
Chief, Anesthesia and Operative Service  
Gen. L. Wood Army Community Hospital  
Fl. L. Wood, Missouri 65473

## REFERENCES

1. Yelderman M, New W: Evaluation of pulse oximetry. *ANESTHESIOLOGY* 59:349-352, 1983
2. New W: Pulse oximetry. *J Clin Monit* 1:126-129, 1985
3. Brooks TD, Paulus DA, Winkle WE: Infrared heat lamps interfere with pulse oximeters (letter). *ANESTHESIOLOGY* 61:630, 1984
4. Eisele JH, Downs D: Ambient light affects pulse oximeters (letter). *ANESTHESIOLOGY* 67:864-865, 1987
5. Mihm FG, Halperin BD: Noninvasive detection of profound arterial desaturation using a pulse oximetry device. *ANESTHESIOLOGY* 62:85-87, 1985
6. Kessler MR, Eide TE, Humayun B, Poppers PJ: Spurious pulse oximeter desaturation with methylene blue infection. *ANESTHESIOLOGY* 65:435-436, 1986
7. Scheller MS, Unger RJ, Kelner MJ: Effects of intravenously administered dyes on pulse oximetry readings. *ANESTHESIOLOGY* 65:550-552, 1986
8. Kataria BK, Lampkins R: Nail polish does not affect pulse oximeter saturation (letter). *Anesth Analg* 65:824, 1986

(Accepted for publication January 25, 1988.)

The opinions or assertions contained herein are the private views of the author and are not to be construed as reflecting the views of the Department of the Army or the Department of the Defense.
